# Supplementary material for: An evolutionary view on the developing prefrontal cortex connectome and its psychopathological networks: Tract tracing and imaging studies linking two distant anthropoid species
Source: Research Square preprint supplement (doi:10.21203/rs.3.rs-8755074/v1), 2026-02-10
Supplement: Supplementary file 1 [file d30c1ebc2894d4b89d7a7fc8.docx]

**sTable1**

OCD (N=12)

| Sex (% female) | 41.7 (n=5) |
| --- | --- |
| Age at implantation (in years) | 41.1±10.3 |
| Y-BOCS at baseline | 31.9±5.4 |
| MADRS at baseline | 17.4±9.3 |
| Age at onset of illness (in years) | 15.0±4.4 |
| Duration of illness (in years) | 25.1±10.9 |
| Number of prior medications | 6.7±2.7 |

**Demographic clinical characteristics for investigation of disease specific connectivities.** Values are mean ± SD; MADRS = Montgomery Asberg Depression Rating Scale; Y-BOCS = Yale-Brown Obsessive Compulsive Scale

**sTable2**

cortico-subcortical (**projection** fibers).

| **OCD,** right |  |  |  |  |
| --- | --- | --- | --- | --- |
| / | / | / | / | / |
| **OCD,** left |  |  |  |  |
| vlPFC-STN | **0.042509*** | 1.785364 | 2.060626 | + |

cortico-cortical (**association** fibers)

| **OCD,** right |  |  |  |  |
| --- | --- | --- | --- | --- |
| OFC - dmPFC | **0.002874*** | 0.070413 | 3.076905 | + |
| dmPFC - (pre)motor | **0.005914*** | 0.144895 | -2.829137 | - |
| dACC- (pre)motor | **0.038283*** | 0.937938 | 2.107082 | + |
| **OCD,** left |  |  |  |  |
| OFC - (pre)motor | **0.045535*** | 1.115605 | 2.031808 | + |
| dmPFC - (pre)motor | **0.023238*** | 0.569325 | -2.314515 | - |
| dACC - dmPFC | **0.040420*** | 0.990286 | 2.083707 | + |

**sTable: Disease specific connectivities for obsessive-compulsive disorder (OCD).** P values and effect sizes.


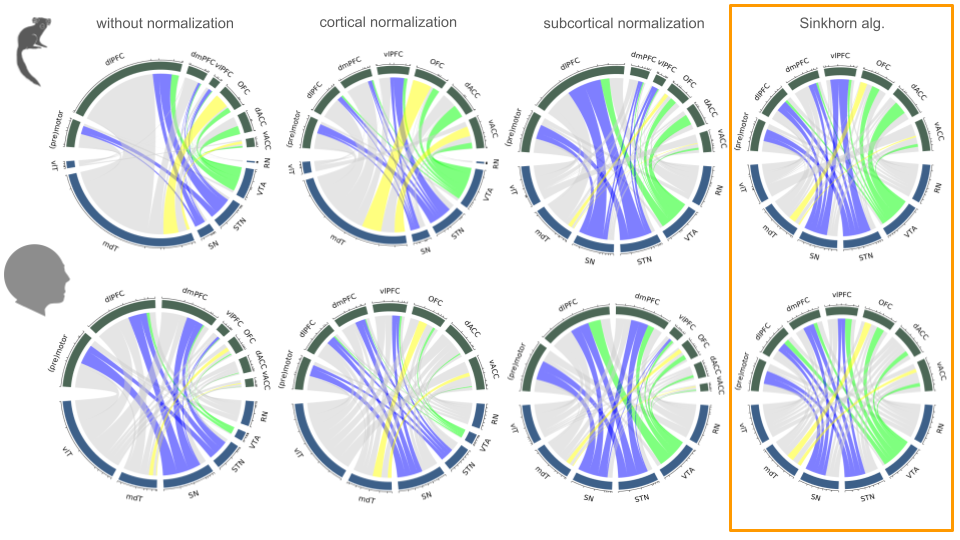


**sFigure1:** Different strategies for normalisation of cord-plots. Note the amount of similarity achieved with bilateral adjustment to subcortical and cortical fibers - according to the Sinkhorn principle - despite different tracking technologies being taken (marmoset, AAvATT vs. human, HCP DTI-FT).


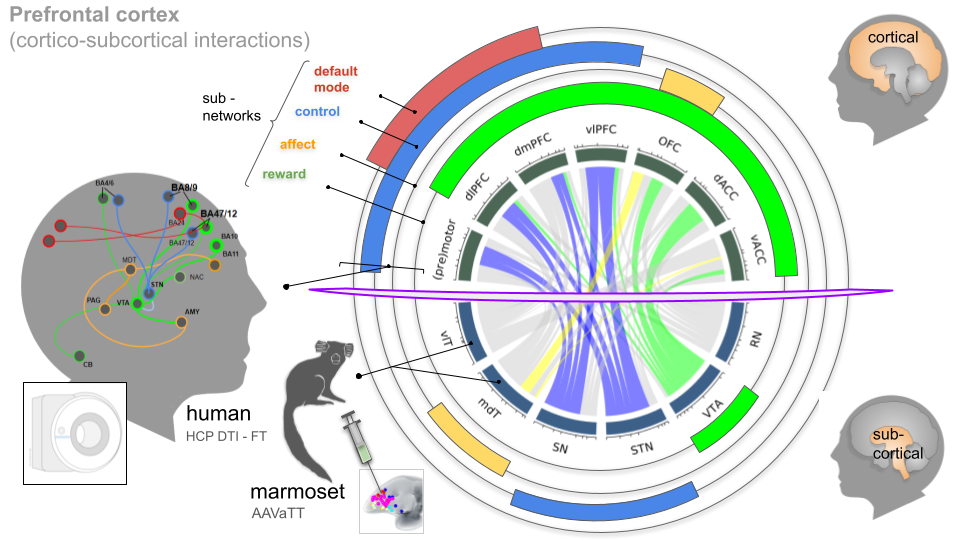


**sFigure2:** Qualitative comparison of sub-network contributions between marmoset (cord-plot, center) and human (orbitals). The purple equator separates cortical and subcortical territories.
